# Supplementary material for: Proving Nanoscale Chiral Interactions of Cyclodextrins and Propranolol Enantiomers by Means of SERS Measurements Performed on a Solid Plasmonic Substrate
Source: MDPI journal article supplement (doi:10.3390/pharmaceutics13101594), 2021-10-01
Supplement: s1 [file s1]

# Supplementary Materials: Proving nanoscale chiral interactions of cyclodextrins and propranolol enantiomers by means of SERS measurements performed on a solid plasmonic substrate

Gabriela Fabiola Știufiuc, Valentin Toma, Anca Onaciu, Vasile Chiș, Constantin Mihai Lucaciu and Rareș Ionuț Știufiuc

**Citation:** Știufiuc, G.F.; Toma, V.; Onaciu, A.; Chiș, V.; Lucaciu, C.M.; Știufiuc, R.I. Proving Nanoscale Chiral Interactions of Cyclodextrins and Propranolol Enantiomers by Means of SERS Measurements Performed on a Solid Plasmonic Substrate. *Pharmaceutics* **2021**, *13*, 1594. <https://doi.org/10.3390/pharmaceutics13101594>

Academic Editor: Ferenc Fenyvesi and Judit Váradi

Received: 27 August 2021

Accepted: 27 September 2021

Published: 1 October 2021

**Publisher's Note:** MDPI stays neutral with regard to jurisdictional claims in published maps and institutional affiliations.

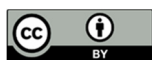

**Copyright:** © 2021 by the authors. Licensee MDPI, Basel, Switzerland. This article is an open access article distributed under the terms and conditions of the Creative Commons Attribution (CC BY) license (<http://creativecommons.org/licenses/by/4.0/>).

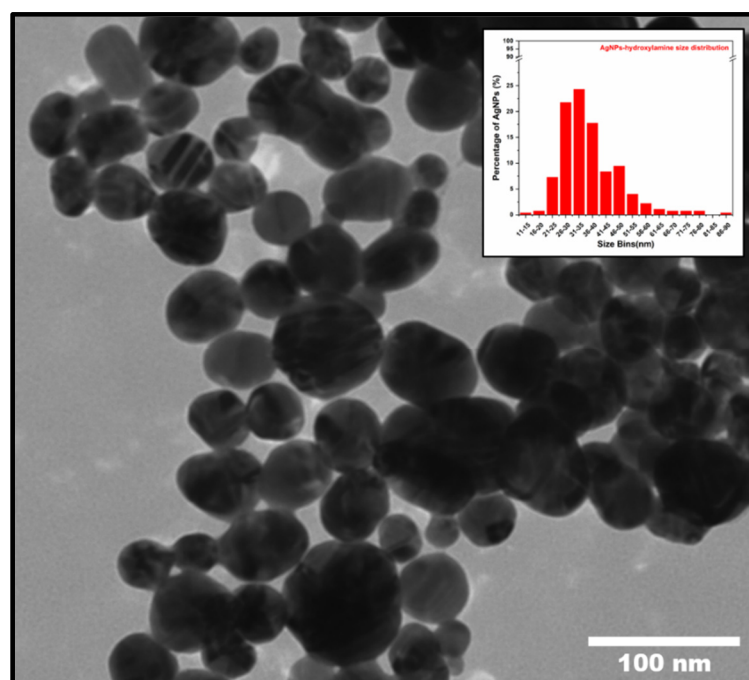

**Figure S1.** TEM image of TFF purified AgHya NPs. The inset shows the size distribution plot of the NPs.

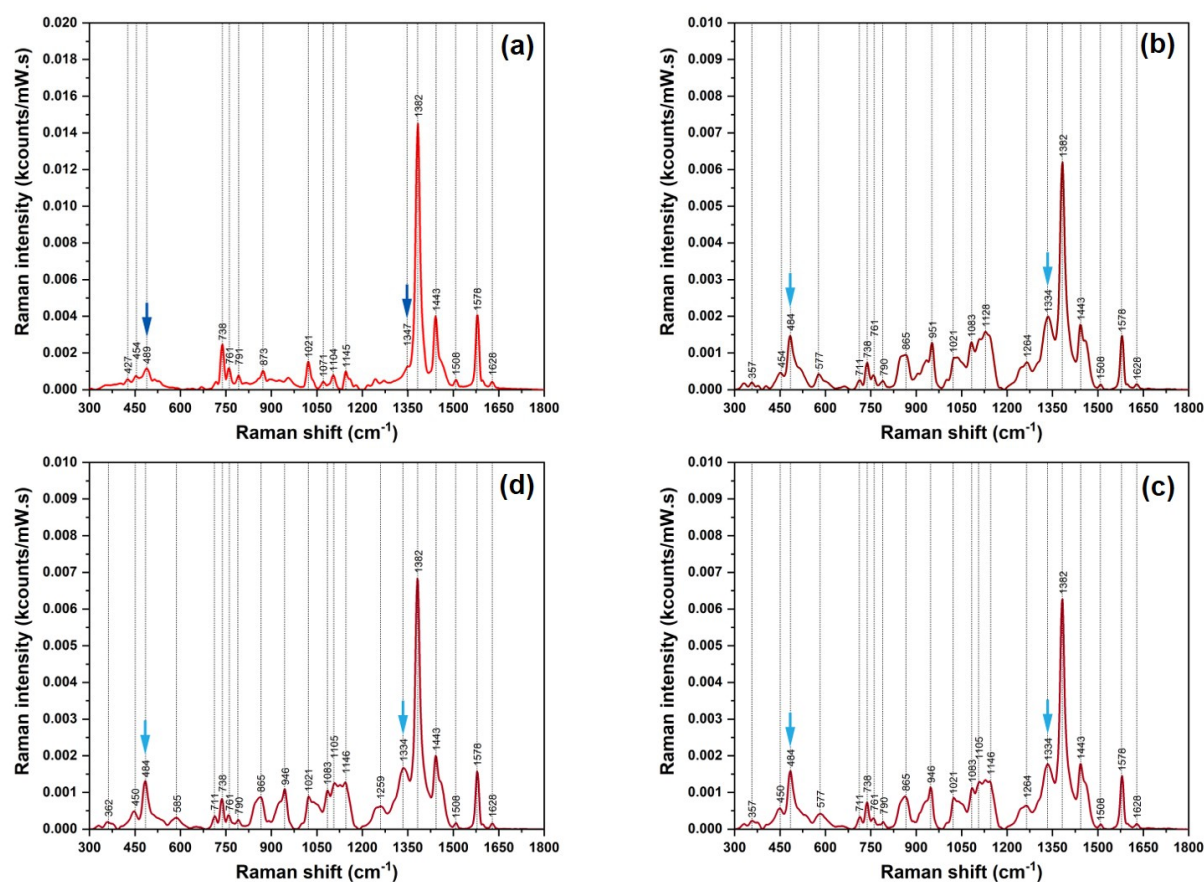

**Figure S2.** Raman spectra of S-PRNL (a) and of the complexes it forms with  $\alpha$ -CD (b),  $\beta$ -CD (c) and  $\gamma$ -CD (d). The spectra have been recorded using an excitation laser of 785 nm. The arrows indicate the two bands specific for the complexes.

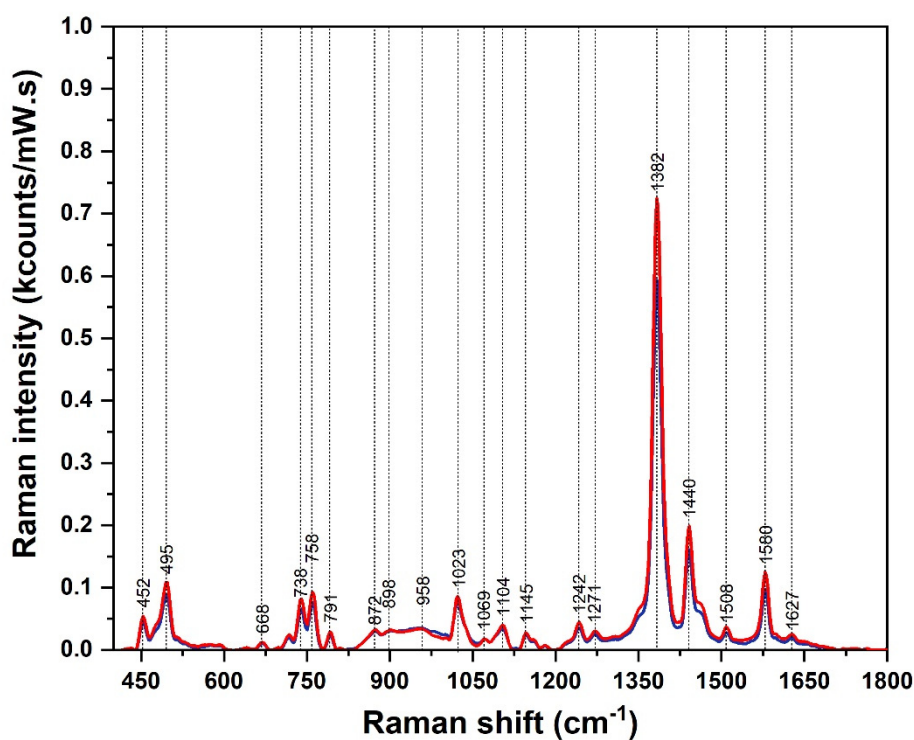

**Figure S3.** SERS spectra of S-PRNL (red line) and R-PRNL (blue line) recorded using a 785 nm excitation laser.
